# Supplementary material for: Baseline patient characteristics, incidence of CINV, and physician perception of CINV incidence following moderately and highly emetogenic chemotherapy in Asia Pacific countries
Source: Springer Nature journal article supplement (doi:10.1007/s00520-014-2373-2), 2014-08-13
Supplement: 520_2014_2373_MOESM1_ESM.pdf [file 520_2014_2373_MOESM1_ESM.pdf]

## **Online Resource**

**Baseline patient characteristics, incidence of CINV, and physician perception of CINV incidence following moderately and highly emetogenic chemotherapy in Asia Pacific countries**

### Authors

Ruey Kuen Hsieh, Alexandre Chan, Hoon-Kyo Kim, Shiyong Yu, Jong Gwang Kim, Myung-Ah Lee, Johan Dalén, Hun Jung, Yan Ping Liu, Thomas A. Burke, Dorothy M. K. Keefe

**Table S1** Baseline patient characteristics: Australia

| Characteristic                                                   | HEC         | MEC         | All patients      |
|------------------------------------------------------------------|-------------|-------------|-------------------|
|                                                                  | (n=42)      | (n=32)      | cycle 1<br>(n=74) |
| Age in years, mean (SD)                                          | 58.4 (12.0) | 63.9 (12.4) | 60.8 (12.4)       |
| <50 years, n (%)                                                 | 11 (26.2)   | 3 (9.4)     | 14 (18.9)         |
| 50–64 years, n (%)                                               | 18 (42.9)   | 14 (43.8)   | 32 (43.2)         |
| ≥65 years, n (%)                                                 | 13 (31.0)   | 15 (46.9)   | 28 (37.8)         |
| Female patients, n (%)                                           | 32 (76.2)   | 23 (71.9)   | 55 (74.3)         |
| Ethnic group: White, n (%)                                       | 40 (95.2)   | 32 (100)    | 72 (97.3)         |
| Asian, n (%)                                                     | 2 (4.8)     | 0           | 2 (2.7)           |
| Treating physician                                               |             |             |                   |
| Medical oncologist, n (%)                                        | 42 (100)    | 30 (93.8)   | 72 (97.3)         |
| Gynecological oncologist, n (%)                                  | 0           | 2 (6.3)     | 2 (2.7)           |
| Primary cancer diagnosis                                         |             |             |                   |
| Breast                                                           | 25 (59.5)   | 7 (21.9)    | 32 (43.2)         |
| Lung                                                             | 9 (21.4)    | 6 (18.8)    | 15 (20.3)         |
| Colon                                                            | 0           | 5 (15.6)    | 5 (6.8)           |
| Rectal                                                           | 0           | 2 (6.3)     | 2 (2.7)           |
| Ovarian                                                          | 0           | 3 (9.4)     | 3 (4.1)           |
| Lymphoma                                                         | 1 (2.4)     | 2 (6.3)     | 3 (4.1)           |
| Endometrial                                                      | 0           | 1 (3.1)     | 1 (1.4)           |
| Gallbladder                                                      | 1 (2.4)     | 0           | 1 (1.4)           |
| Other <sup>a</sup>                                               | 6 (7.1)     | 6 (18.8)    | 12 (16.2)         |
| Metastatic disease, n (%)                                        | 9 (21.4)    | 14 (43.8)   | 23 (31.1)         |
| No alcoholic drinks, n (%)                                       | 14 (33.3)   | 12 (37.5)   | 26 (35.1)         |
| 1–7 alcoholic drinks/wk, n (%)                                   | 17 (40.5)   | 14 (43.8)   | 31 (41.9)         |
| 8–14 alcoholic drinks/wk, n (%)                                  | 8 (19.0)    | 5 (15.6)    | 13 (17.6)         |
| ≥15 alcoholic drinks/wk, n (%)                                   | 3 (7.1)     | 1 (3.1)     | 4 (5.4)           |
| History of motion sickness, n (%)                                | 9 (21.4)    | 10 (31.3)   | 19 (25.7)         |
| Nausea or vomiting during previous pregnancy, <sup>b</sup> n (%) | 9 (28.1)    | 11 (47.8)   | 20 (36.4)         |

<sup>a</sup>Most common ‘other’ cancers included melanoma, occult primary cancer, and cancer of the bladder.

<sup>b</sup>Percentage of women.

**Table S2** Baseline patient characteristics: China

| Characteristic                                                   | HEC         | MEC        | All patients       |
|------------------------------------------------------------------|-------------|------------|--------------------|
|                                                                  | (n=77)      | (n=76)     | cycle 1<br>(n=153) |
| Age in years, mean (SD)                                          | 52.3 (11.8) | 54.2 (9.8) | 53.2 (10.8)        |
| <50 years, n (%)                                                 | 30 (39.0)   | 27 (35.5)  | 57 (37.3)          |
| 50–64 years, n (%)                                               | 32 (41.6)   | 39 (51.3)  | 71 (46.4)          |
| ≥65 years, n (%)                                                 | 15 (19.5)   | 10 (13.2)  | 25 (16.3)          |
| Female patients, n (%)                                           | 39 (50.6)   | 43 (56.6)  | 82 (53.6)          |
| Ethnic group: Han, n (%)                                         | 76 (98.7)   | 75 (98.7)  | 151 (98.7)         |
| Other, n (%)                                                     | 1 (1.3)     | 1 (1.3)    | 2 (1.3)            |
| Treating physician                                               |             |            |                    |
| Medical oncologist, n (%)                                        | 63 (81.8)   | 44 (57.9)  | 107 (69.9)         |
| Surgeon, n (%)                                                   | 9 (11.7)    | 12 (15.8)  | 21 (13.7)          |
| Gynecological oncologist, n (%)                                  | 5 (6.5)     | 20 (26.3)  | 25 (16.3)          |
| Primary cancer diagnosis                                         |             |            |                    |
| Breast                                                           | 24 (31.2)   | 10 (13.2)  | 34 (22.2)          |
| Lung                                                             | 39 (50.6)   | 27 (35.5)  | 66 (43.1)          |
| Colon                                                            | 0           | 7 (9.2)    | 7 (4.6)            |
| Stomach                                                          | 1 (1.3)     | 3 (3.9)    | 4 (2.6)            |
| Rectal                                                           | 0           | 1 (1.3)    | 1 (0.7)            |
| Ovarian                                                          | 0           | 11 (14.5)  | 11 (7.2)           |
| Lymphoma                                                         | 1 (1.3)     | 2 (2.6)    | 3 (2.0)            |
| Endometrial                                                      | 2 (2.6)     | 7 (9.2)    | 9 (5.9)            |
| Gallbladder                                                      | 1 (1.3)     | 0          | 1 (0.7)            |
| Other <sup>a</sup>                                               | 9 (11.7)    | 8 (10.5)   | 17 (11.1)          |
| Metastatic disease, n (%)                                        | 19 (24.7)   | 34 (44.7)  | 53 (34.6)          |
| No alcoholic drinks, n (%)                                       | 59 (76.6)   | 63 (82.9)  | 122 (79.7)         |
| 1–7 alcoholic drinks/wk, n (%)                                   | 14 (18.2)   | 10 (13.2)  | 24 (15.7)          |
| 8–14 alcoholic drinks/wk, n (%)                                  | 4 (5.2)     | 1 (1.3)    | 5 (3.3)            |
| ≥15 alcoholic drinks/wk, n (%)                                   | 0           | 2 (2.6)    | 2 (1.3)            |
| History of motion sickness, n (%)                                | 8 (10.4)    | 5 (6.6)    | 13 (8.5)           |
| Nausea or vomiting during previous pregnancy, <sup>b</sup> n (%) | 17 (43.6)   | 13 (30.2)  | 30 (36.6)          |

<sup>a</sup>Most common ‘other’ cancers included cervical, nasopharyngeal, and fallopian/peritoneal cancer.

<sup>b</sup>Percentage of women.

**Table S3** Baseline patient characteristics: India<sup>a</sup>

| Characteristic                                                   | HEC         | MEC         | All patients      |
|------------------------------------------------------------------|-------------|-------------|-------------------|
|                                                                  | (n=43)      | (n=45)      | cycle 1<br>(n=88) |
| Age in years, mean (SD)                                          | 51.1 (11.6) | 52.2 (10.7) | 51.6 (11.1)       |
| <50 years, n (%)                                                 | 19 (44.2)   | 16 (35.6)   | 35 (39.8)         |
| 50–64 years, n (%)                                               | 19 (44.2)   | 25 (55.6)   | 44 (50.0)         |
| ≥65 years, n (%)                                                 | 5 (11.6)    | 4 (8.9)     | 9 (10.2)          |
| Female patients, n (%)                                           | 40 (93.0)   | 15 (33.3)   | 55 (62.5)         |
| Treating physician                                               |             |             |                   |
| Medical oncologist, n (%)                                        | 43 (100)    | 44 (97.8)   | 87 (98.9)         |
| Surgeon, n (%)                                                   | 0           | 1 (2.2)     | 1 (1.1)           |
| Primary cancer diagnosis                                         |             |             |                   |
| Breast                                                           | 35 (81.4)   | 4 (8.9)     | 39 (44.3)         |
| Lung                                                             | 2 (4.7)     | 18 (40.0)   | 20 (22.7)         |
| Colon                                                            | 0           | 4 (8.9)     | 4 (4.5)           |
| Stomach                                                          | 1 (2.3)     | 2 (4.4)     | 3 (3.4)           |
| Rectal                                                           | 0           | 1 (2.2)     | 1 (1.1)           |
| Ovarian                                                          | 0           | 2 (4.4)     | 2 (2.3)           |
| Lymphoma                                                         | 1 (2.3)     | 6 (13.3)    | 7 (8.0)           |
| Endometrial                                                      | 0           | 2 (4.4)     | 2 (2.3)           |
| Other <sup>b</sup>                                               | 4 (9.3)     | 6 (13.3)    | 10 (11.4)         |
| Metastatic disease, n (%)                                        | 9 (20.9)    | 14 (31.1)   | 23 (26.1)         |
| No alcoholic drinks, n (%)                                       | 43 (100)    | 40 (88.9)   | 83 (94.3)         |
| 1–7 alcoholic drinks/wk, n (%)                                   | 0           | 5 (11.1)    | 5 (5.7)           |
| 8–14 alcoholic drinks/wk, n (%)                                  | 0           | 0           | 0                 |
| History of motion sickness, n (%)                                | 3 (7.0)     | 3 (6.7)     | 6 (6.8)           |
| Nausea or vomiting during previous pregnancy, <sup>c</sup> n (%) | 27 (67.5)   | 5 (33.3)    | 32 (58.2)         |

<sup>a</sup>Ethnicity was not recorded in India.

<sup>b</sup>Most common ‘other’ cancers included cervical and esophageal cancer.

<sup>c</sup>Percentage of women.

**Table S4** Baseline patient characteristics: Singapore

| Characteristic                                                   | All patients  |               |                   |
|------------------------------------------------------------------|---------------|---------------|-------------------|
|                                                                  | HEC<br>(n=20) | MEC<br>(n=37) | cycle 1<br>(n=57) |
| Age in years, mean (SD)                                          | 51.6 (11.3)   | 55.5 (11.4)   | 54.1 (11.4)       |
| <50 years, n (%)                                                 | 6 (30.0)      | 12 (32.4)     | 18 (31.6)         |
| 50–64 years, n (%)                                               | 12 (60.0)     | 17 (45.9)     | 29 (50.9)         |
| ≥65 years, n (%)                                                 | 2 (10.0)      | 8 (21.6)      | 10 (17.5)         |
| Female patients, n (%)                                           | 14 (70.0)     | 21 (56.8)     | 35 (61.4)         |
| Ethnic group: Chinese, n (%)                                     | 18 (90.0)     | 32 (86.5)     | 50 (87.5)         |
| Malay, n (%)                                                     | 0             | 3 (8.3)       | 3 (5.4)           |
| Indian, n (%)                                                    | 1 (5.0)       | 2 (5.6)       | 3 (5.4)           |
| Other, n (%)                                                     | 1 (5.0)       | 0             | 1 (1.8)           |
| Treating physician                                               |               |               |                   |
| Medical oncologist, n (%)                                        | 20 (100)      | 37 (100)      | 57 (100)          |
| Primary cancer diagnosis                                         |               |               |                   |
| Breast                                                           | 12 (60.0)     | 8 (21.6)      | 20 (35.1)         |
| Lung                                                             | 2 (10.0)      | 1 (2.7)       | 3 (5.3)           |
| Colon                                                            | 0             | 15 (40.5)     | 15 (26.3)         |
| Stomach                                                          | 0             | 2 (5.4)       | 2 (3.5)           |
| Rectal                                                           | 0             | 2 (5.4)       | 2 (3.5)           |
| Ovarian                                                          | 0             | 4 (10.8)      | 4 (7.0)           |
| Lymphoma                                                         | 2 (10.0)      | 0             | 2 (3.5)           |
| Endometrial                                                      | 0             | 1 (2.7)       | 1 (1.8)           |
| Other <sup>a</sup>                                               | 4 (20.0)      | 4 (10.8)      | 8 (14.0)          |
| Metastatic disease, n (%)                                        | 4 (20.0)      | 18 (48.6)     | 22 (38.6)         |
| No alcoholic drinks, n (%)                                       | 17 (85.0)     | 33 (89.2)     | 50 (87.7)         |
| 1–7 alcoholic drinks/wk, n (%)                                   | 2 (10.0)      | 3 (8.1)       | 5 (8.8)           |
| 8–14 alcoholic drinks/wk, n (%)                                  | 1 (5.0)       | 1 (2.7)       | 2 (3.5)           |
| ≥15 alcoholic drinks/wk, n (%)                                   | 0             | 0             | 0                 |
| History of motion sickness, n (%)                                | 5 (25.0)      | 6 (16.2)      | 11 (19.3)         |
| Nausea or vomiting during previous pregnancy, <sup>b</sup> n (%) | 8 (57.1)      | 8 (38.1)      | 16 (45.7)         |

<sup>a</sup>Most common ‘other’ cancers included occult primary and double primary cancer.

<sup>b</sup>Percentage of women.

**Table S5** Baseline patient characteristics: South Korea

| Characteristic                                                   | HEC         | MEC         | All patients       |
|------------------------------------------------------------------|-------------|-------------|--------------------|
|                                                                  | (n=80)      | (n=71)      | cycle 1<br>(n=151) |
| Age in years, mean (SD)                                          | 56.2 (13.0) | 60.8 (10.8) | 58.4 (12.2)        |
| <50 years, n (%)                                                 | 24 (30.0)   | 8 (11.3)    | 32 (21.2)          |
| 50–64 years, n (%)                                               | 30 (37.5)   | 36 (50.7)   | 66 (43.7)          |
| ≥65 years, n (%)                                                 | 26 (32.5)   | 27 (38.0)   | 53 (35.1)          |
| Female patients, n (%)                                           | 44 (55.0)   | 31 (43.7)   | 75 (49.7)          |
| Ethnic group: Korean or Asian, n (%)                             | 80 (100)    | 71 (100)    | 151 (100)          |
| Treating physician                                               |             |             |                    |
| Medical oncologist, n (%)                                        | 76 (95.0)   | 62 (87.3)   | 138 (91.4)         |
| Surgeon, n (%)                                                   | 3 (3.8)     | 8 (11.3)    | 11 (7.3)           |
| Gynecological oncologist, n (%)                                  | 1 (1.3)     | 1 (1.4)     | 2 (1.3)            |
| Primary cancer diagnosis                                         |             |             |                    |
| Breast                                                           | 19 (23.8)   | 0           | 19 (12.6)          |
| Lung                                                             | 24 (30.0)   | 2 (2.8)     | 26 (17.2)          |
| Colon                                                            | 0           | 43 (60.6)   | 43 (28.5)          |
| Stomach                                                          | 12 (15.0)   | 7 (9.9)     | 19 (12.6)          |
| Rectal                                                           | 0           | 11 (15.5)   | 11 (7.3)           |
| Ovarian                                                          | 0           | 2 (2.8)     | 2 (1.3)            |
| Lymphoma                                                         | 2 (2.5)     | 0           | 2 (1.3)            |
| Endometrial                                                      | 2 (2.5)     | 0           | 2 (1.3)            |
| Gallbladder                                                      | 8 (10.0)    | 0           | 8 (5.3)            |
| Other <sup>a</sup>                                               | 13 (16.3)   | 6 (8.5)     | 19 (12.6)          |
| Metastatic disease, n (%)                                        | 37 (46.3)   | 54 (76.1)   | 91 (60.3)          |
| No alcoholic drinks, n (%)                                       | 62 (77.5)   | 59 (83.1)   | 121 (80.1)         |
| 1–7 alcoholic drinks/wk, n (%)                                   | 18 (22.5)   | 11 (15.5)   | 29 (19.2)          |
| 8–14 alcoholic drinks/wk, n (%)                                  | 0           | 1 (1.4)     | 1 (0.7)            |
| ≥15 alcoholic drinks/wk, n (%)                                   | 0           | 0           | 0                  |
| History of motion sickness, n (%)                                | 9 (11.3)    | 3 (4.2)     | 12 (7.9)           |
| Nausea or vomiting during previous pregnancy, <sup>b</sup> n (%) | 19 (43.2)   | 14 (45.2)   | 33 (44.0)          |

<sup>a</sup>Most common ‘other’ cancers included cholangiocarcinoma and liver, pancreatic, cervical, thymic, and ampulla of Vater cancer.

<sup>b</sup>Percentage of women.

**Table S6** Baseline patient characteristics: Taiwan

| Characteristic                                                   | HEC         | MEC         | All patients       |
|------------------------------------------------------------------|-------------|-------------|--------------------|
|                                                                  | (n=56)      | (n=69)      | cycle 1<br>(n=125) |
| Age in years, mean (SD)                                          | 53.6 (10.1) | 58.6 (13.1) | 56.4 (12.0)        |
| <50 years, n (%)                                                 | 20 (35.7)   | 16 (23.2)   | 36 (28.8)          |
| 50–64 years, n (%)                                               | 28 (50.0)   | 32 (46.4)   | 60 (48.0)          |
| ≥65 years, n (%)                                                 | 8 (14.3)    | 21 (30.4)   | 29 (23.2)          |
| Female patients, n (%)                                           | 39 (69.6)   | 33 (47.8)   | 72 (57.6)          |
| Ethnic group: Taiwanese, n (%)                                   | 56 (100)    | 69 (100)    | 125 (100)          |
| Treating physician                                               |             |             |                    |
| Medical oncologist, n (%)                                        | 32 (57.1)   | 13 (18.8)   | 45 (36.0)          |
| Surgeon, n (%)                                                   | 24 (42.9)   | 56 (81.1)   | 80 (64.0)          |
| Primary cancer diagnosis                                         |             |             |                    |
| Breast                                                           | 30 (53.6)   | 1 (1.4)     | 31 (24.8)          |
| Lung                                                             | 14 (25.0)   | 0           | 14 (11.2)          |
| Colon                                                            |             | 53 (76.8)   | 53 (42.4)          |
| Stomach                                                          | 2 (3.6)     | 2 (2.9)     | 4 (3.2)            |
| Rectal                                                           | 0           | 8 (11.6)    | 8 (6.4)            |
| Lymphoma                                                         | 1 (1.8)     | 2 (2.9)     | 3 (2.4)            |
| Other <sup>a</sup>                                               | 9 (16.1)    | 3 (4.3)     | 12 (9.6)           |
| Metastatic disease, n (%)                                        | 15 (26.8)   | 23 (33.3)   | 38 (30.4)          |
| No alcoholic drinks, n (%)                                       | 50 (89.3)   | 66 (95.7)   | 116 (92.8)         |
| 1–7 alcoholic drinks/wk, n (%)                                   | 5 (8.9)     | 1 (1.4)     | 6 (4.8)            |
| 8–14 alcoholic drinks/wk, n (%)                                  | 0           | 1 (1.4)     | 1 (0.8)            |
| ≥15 alcoholic drinks/wk, n (%)                                   | 1 (1.8)     | 1 (1.4)     | 2 (1.6)            |
| History of motion sickness, n (%)                                | 11 (19.6)   | 19 (27.5)   | 30 (24.0)          |
| Nausea or vomiting during previous pregnancy, <sup>b</sup> n (%) | 23 (59.0)   | 12 (36.4)   | 35 (48.6)          |

<sup>a</sup>Most common ‘other’ cancers included cancers of the head and neck.

<sup>b</sup>Percentage of women.

**Table S7** Chemotherapy drugs administered in cycle 1 to  $\geq 3\%$  of patients receiving a HEC regimen

| <b>Chemotherapy drug</b>                            | <b>HEC Patients, <i>n</i> (%)</b><br><b>(<i>N</i>=318)</b> |
|-----------------------------------------------------|------------------------------------------------------------|
| Cisplatin                                           | 168 (52.8)                                                 |
| Cyclophosphamide, parenteral <1500mg/m <sup>2</sup> | 149 (46.9)                                                 |
| Fluorouracil                                        | 91 (28.6)                                                  |
| Epirubicin                                          | 82 (25.8)                                                  |
| Doxorubicin                                         | 70 (22.0)                                                  |
| Gemcitabine                                         | 40 (12.6)                                                  |
| Pemetrexed                                          | 28 (8.8)                                                   |
| Docetaxel                                           | 25 (7.9)                                                   |
| Etoposide                                           | 16 (5.0)                                                   |
| Paclitaxel                                          | 12 (3.8)                                                   |
| Vinorelbine                                         | 12 (3.8)                                                   |
| Tegafur                                             | 10 (3.1)                                                   |

*HEC* highly emetogenic chemotherapy



**Table S8** Chemotherapy drugs administered in cycle 1 to  $\geq 3\%$  of patients receiving a MEC regimen

| <b>Chemotherapy drug</b>                            | <b>MEC Patients, <i>n</i> (%)</b><br><b>(<i>N</i>=330)</b> |
|-----------------------------------------------------|------------------------------------------------------------|
| Oxaliplatin                                         | 158 (47.9)                                                 |
| Carboplatin                                         | 111 (33.6)                                                 |
| Fluorouracil                                        | 99 (30.0)                                                  |
| Paclitaxel                                          | 66 (20.0)                                                  |
| Capecitabine                                        | 55 (16.7)                                                  |
| Cyclophosphamide, parenteral <1500mg/m <sup>2</sup> | 38 (11.5)                                                  |
| Docetaxel                                           | 29 (8.8)                                                   |
| Bevacizumab                                         | 21 (6.4)                                                   |
| Gemcitabine                                         | 21 (6.4)                                                   |
| Irinotecan                                          | 18 (5.5)                                                   |
| Epirubicin                                          | 16 (4.8)                                                   |
| Vincristine                                         | 13 (3.9)                                                   |
| Cetuximab                                           | 12 (3.6)                                                   |

*MEC* moderately emetogenic chemotherapy

**Table S9** Rescue antiemetic medications prescribed in cycle 1, by country and overall<sup>a</sup>

| <b>Chemotherapy regimen</b>           | <b>Australia</b> | <b>China</b> | <b>India</b> | <b>Singapore</b> | <b>So. Korea</b> | <b>Taiwan</b> | <b>All Patients, cycle 1</b> |
|---------------------------------------|------------------|--------------|--------------|------------------|------------------|---------------|------------------------------|
| <i>HEC:</i>                           | <i>n=42</i>      | <i>n=77</i>  | <i>n=43</i>  | <i>n=20</i>      | <i>n=80</i>      | <i>n=56</i>   | <i>n=318</i>                 |
| Patients with any rescue prescription | 39 (92.9)        | 12 (15.6)    | 13 (30.2)    | 18 (90.0)        | 8 (10.0)         | 9 (16.1)      | 99 (31.1)                    |
| Primary antiemetic                    | 4 (9.5)          | 8 (10.4)     | 8 (18.6)     | 2 (10.0)         | 4 (5.0)          | 7 (12.5)      | 33 (10.4)                    |
| Secondary antiemetic                  | 39 (92.9)        | 10 (13.0)    | 5 (11.6)     | 18 (90.0)        | 6 (7.5)          | 9 (16.1)      | 87 (27.4)                    |
| <i>MEC:</i>                           | <i>n=32</i>      | <i>n=76</i>  | <i>n=45</i>  | <i>n=37</i>      | <i>n=71</i>      | <i>n=69</i>   | <i>n=330</i>                 |
| Patients with any rescue prescription | 24 (75.0)        | 13 (17.1)    | 15 (33.3)    | 35 (94.6)        | 7 (9.9)          | 20 (29.0)     | 114 (34.5)                   |
| Primary antiemetic                    | 0                | 8 (10.5)     | 15 (33.3)    | 6 (16.2)         | 3 (4.2)          | 20 (29.0)     | 52 (15.8)                    |
| Secondary antiemetic                  | 24 (75.0)        | 12 (15.8)    | 0            | 35 (94.6)        | 6 (8.5)          | 3 (4.3)       | 80 (24.2)                    |

*HEC* highly emetogenic chemotherapy, *MEC* moderately emetogenic chemotherapy.

<sup>a</sup>Patients could be prescribed more than one rescue antiemetic medication, and receipt of a prescription does not denote rescue medication use.

**Table S10** CINV incidence in cycle 2 among patients receiving HEC, by country and overall

|                                  | <b>Australia</b><br>(n=37) | <b>China</b><br>(n=64) | <b>India</b><br>(n=43) | <b>Singapore</b><br>(n=20) | <b>So. Korea</b><br>(n=74) | <b>Taiwan</b><br>(n=55) | <b>Total</b><br>(n=293) | <b>P value<sup>a</sup></b> |
|----------------------------------|----------------------------|------------------------|------------------------|----------------------------|----------------------------|-------------------------|-------------------------|----------------------------|
| Overall phase, n (%)             |                            |                        |                        |                            |                            |                         |                         |                            |
| Complete response                | 19 (51.4)                  | 38 (59.4)              | 34 (79.1)              | 11 (55.0)                  | 62 (83.8)                  | 44 (80.0)               | 208 (71.0)              | <0.001                     |
| No emesis                        | 34 (91.9)                  | 40 (62.5)              | 34 (79.1)              | 16 (80.0)                  | 65 (87.8)                  | 44 (80.0)               | 233 (79.5)              | 0.003                      |
| No nausea                        | 13 (35.1)                  | 17 (26.6)              | 22 (51.2)              | 9 (45.0)                   | 36 (48.6)                  | 18 (32.7)               | 115 (39.2)              | 0.049                      |
| No clinically significant nausea | 16 (43.2)                  | 24 (37.5)              | 27 (62.8)              | 10 (50.0)                  | 43 (58.1)                  | 29 (52.7)               | 149 (50.9)              | 0.090                      |
| No use of rescue antiemetic      | 19 (51.4)                  | 55 (85.9)              | 42 (97.7)              | 12 (60.0)                  | 70 (94.6)                  | 54 (98.2)               | 252 (86.0)              | <0.001                     |
| No clinically significant NV     | 16 (43.2)                  | 22 (34.4)              | 27 (62.8)              | 10 (50.0)                  | 43 (58.1)                  | 25 (45.5)               | 143 (48.8)              | 0.035                      |
| Acute phase, n (%)               |                            |                        |                        |                            |                            |                         |                         |                            |
| Complete response                | 24 (64.9)                  | 45 (70.3)              | 34 (79.1)              | 14 (70.0)                  | 64 (86.5)                  | 51 (92.7)               | 232 (79.2)              | 0.004                      |
| No emesis                        | 36 (97.3)                  | 47 (73.4)              | 34 (79.1)              | 18 (90.0)                  | 66 (89.2)                  | 51 (92.7)               | 252 (86.0)              | 0.005                      |
| No nausea                        | 18 (48.6)                  | 29 (45.3)              | 26 (60.5)              | 11 (55.0)                  | 42 (56.8)                  | 29 (52.7)               | 155 (52.9)              | 0.667                      |
| No clinically significant nausea | 23 (62.2)                  | 38 (59.4)              | 32 (74.4)              | 11 (55.0)                  | 47 (63.5)                  | 37 (67.3)               | 188 (64.2)              | 0.602                      |
| No use of rescue antiemetic      | 25 (67.6)                  | 60 (93.8)              | 42 (97.7)              | 15 (75.0)                  | 71 (95.9)                  | 55 (100)                | 268 (91.5)              | <0.001                     |
| No clinically significant NV     | 23 (62.2)                  | 37 (57.8)              | 30 (69.8)              | 11 (55.0)                  | 46 (62.2)                  | 36 (65.5)               | 183 (62.5)              | 0.812                      |
| Delayed phase, n (%)             |                            |                        |                        |                            |                            |                         |                         |                            |
| Complete response                | 20 (54.1)                  | 42 (65.6)              | 38 (88.4)              | 14 (70.0)                  | 67 (90.5)                  | 46 (83.6)               | 227 (77.5)              | <0.001                     |
| No emesis                        | 35 (94.6)                  | 44 (68.8)              | 38 (88.4)              | 18 (90.0)                  | 70 (94.6)                  | 46 (83.6)               | 251 (85.7)              | <0.001                     |
| No nausea                        | 14 (37.8)                  | 19 (29.7)              | 26 (60.5)              | 11 (55.0)                  | 40 (54.1)                  | 24 (43.6)               | 134 (45.7)              | 0.014                      |
| No clinically significant nausea | 17 (45.9)                  | 25 (39.1)              | 31 (72.1)              | 14 (70.0)                  | 48 (64.9)                  | 35 (63.6)               | 170 (58.0)              | 0.002                      |
| No use of rescue antiemetic      | 20 (54.1)                  | 55 (85.9)              | 42 (97.7)              | 15 (75.0)                  | 70 (94.6)                  | 54 (98.2)               | 256 (87.4)              | <0.001                     |
| No clinically significant NV     | 17 (45.9)                  | 23 (35.9)              | 31 (72.1)              | 14 (70.0)                  | 48 (64.9)                  | 31 (56.4)               | 164 (56.0)              | 0.001                      |

CINV chemotherapy-induced nausea and vomiting, HEC highly emetogenic chemotherapy, NV nausea or vomiting.

<sup>a</sup>P value based on Pearson's  $\chi^2$  test for general association.

**Table S11** CINV incidence in cycle 2 among patients receiving MEC, by country and overall

|                                  | <b>Australia</b><br>(n=27) | <b>China</b><br>(n=73) | <b>India</b><br>(n=41) | <b>Singapore</b><br>(n=33) | <b>So. Korea</b><br>(n=63) | <b>Taiwan</b><br>(n=68) | <b>Total</b><br>(n=305) | <b>P value<sup>a</sup></b> |
|----------------------------------|----------------------------|------------------------|------------------------|----------------------------|----------------------------|-------------------------|-------------------------|----------------------------|
| Overall phase, n (%)             |                            |                        |                        |                            |                            |                         |                         |                            |
| Complete response                | 16 (59.3)                  | 47 (64.4)              | 37 (90.2)              | 29 (87.9)                  | 54 (85.7)                  | 61 (89.7)               | 244 (80.0)              | <0.001                     |
| No emesis                        | 26 (96.3)                  | 49 (67.1)              | 37 (90.2)              | 29 (87.9)                  | 54 (85.7)                  | 62 (91.2)               | 257 (84.3)              | <0.001                     |
| No nausea                        | 16 (59.3)                  | 32 (43.8)              | 35 (85.4)              | 25 (75.8)                  | 33 (52.4)                  | 33 (48.5)               | 174 (57.0)              | <0.001                     |
| No clinically significant nausea | 17 (63.0)                  | 40 (54.8)              | 38 (92.7)              | 28 (84.8)                  | 40 (63.5)                  | 43 (63.2)               | 206 (67.5)              | <0.001                     |
| No use of rescue antiemetic      | 17 (63.0)                  | 61 (83.6)              | 41 (100)               | 32 (97.0)                  | 61 (96.8)                  | 64 (94.1)               | 276 (90.5)              | <0.001                     |
| No clinically significant NV     | 17 (63.0)                  | 40 (54.8)              | 36 (87.8)              | 27 (81.8)                  | 39 (61.9)                  | 43 (63.2)               | 202 (66.2)              | 0.004                      |
| Acute phase, n (%)               |                            |                        |                        |                            |                            |                         |                         |                            |
| Complete response                | 21 (77.8)                  | 63 (86.3)              | 38 (92.7)              | 31 (93.9)                  | 59 (93.7)                  | 66 (97.1)               | 278 (91.1)              | 0.035                      |
| No emesis                        | 26 (96.3)                  | 64 (87.7)              | 38 (92.7)              | 32 (97.0)                  | 59 (93.7)                  | 67 (98.5)               | 286 (93.8)              | 0.143                      |
| No nausea                        | 19 (70.4)                  | 49 (67.1)              | 36 (87.8)              | 29 (87.9)                  | 38 (60.3)                  | 40 (58.8)               | 211 (69.2)              | 0.003                      |
| No clinically significant nausea | 22 (81.5)                  | 58 (79.5)              | 39 (95.1)              | 32 (97.0)                  | 45 (71.4)                  | 50 (73.5)               | 246 (80.7)              | 0.005                      |
| No use of rescue antiemetic      | 22 (81.5)                  | 68 (93.2)              | 41 (100)               | 32 (97.0)                  | 62 (98.4)                  | 67 (98.5)               | 292 (95.7)              | 0.002                      |
| No clinically significant NV     | 22 (81.5)                  | 57 (78.1)              | 37 (90.2)              | 32 (97.0)                  | 45 (71.4)                  | 50 (73.5)               | 243 (79.7)              | 0.021                      |
| Delayed phase, n (%)             |                            |                        |                        |                            |                            |                         |                         |                            |
| Complete response                | 17 (63.0)                  | 48 (65.8)              | 38 (92.7)              | 29 (87.9)                  | 56 (88.9)                  | 61 (89.7)               | 249 (81.6)              | <0.001                     |
| No emesis                        | 27 (100)                   | 49 (67.1)              | 38 (92.7)              | 29 (87.9)                  | 56 (88.9)                  | 63 (92.6)               | 262 (85.9)              | <0.001                     |
| No nausea                        | 17 (63.0)                  | 35 (47.9)              | 35 (85.4)              | 25 (75.8)                  | 36 (57.1)                  | 42 (61.8)               | 190 (62.3)              | 0.002                      |
| No clinically significant nausea | 18 (66.7)                  | 40 (54.8)              | 39 (95.1)              | 28 (84.8)                  | 46 (73.0)                  | 50 (73.5)               | 221 (72.5)              | <0.001                     |
| No use of rescue antiemetic      | 17 (63.0)                  | 62 (84.9)              | 41 (100)               | 32 (97.0)                  | 61 (96.8)                  | 64 (94.1)               | 277 (90.8)              | <0.001                     |
| No clinically significant NV     | 18 (66.7)                  | 40 (54.8)              | 38 (92.7)              | 27 (81.8)                  | 45 (71.4)                  | 50 (73.5)               | 218 (71.5)              | <0.001                     |

CINV chemotherapy-induced nausea and vomiting, MEC moderately emetogenic chemotherapy, NV nausea or vomiting.

<sup>a</sup>P value based on Pearson's  $\chi^2$  test for general association.

**Table S12** CINV incidence in cycle 3 among patients receiving HEC, by country and overall

|                                  | <b>Australia</b><br>(n=35) | <b>China</b><br>(n=49) | <b>India</b><br>(n=38) | <b>Singapore</b><br>(n=20) | <b>So. Korea</b><br>(n=68) | <b>Taiwan</b><br>(n=54) | <b>Total</b><br>(n=264) | <b>P value<sup>a</sup></b> |
|----------------------------------|----------------------------|------------------------|------------------------|----------------------------|----------------------------|-------------------------|-------------------------|----------------------------|
| Overall phase, n (%)             |                            |                        |                        |                            |                            |                         |                         |                            |
| Complete response                | 21 (60.0)                  | 31 (63.3)              | 28 (73.7)              | 15 (75.0)                  | 58 (85.3)                  | 37 (68.5)               | 190 (72.0)              | 0.056                      |
| No emesis                        | 32 (91.4)                  | 31 (63.3)              | 29 (76.3)              | 18 (90.0)                  | 60 (88.2)                  | 39 (72.2)               | 209 (79.2)              | 0.004                      |
| No nausea                        | 13 (37.1)                  | 18 (36.7)              | 21 (55.3)              | 9 (45.0)                   | 36 (52.9)                  | 18 (33.3)               | 115 (43.6)              | 0.137                      |
| No clinically significant nausea | 15 (42.9)                  | 23 (46.9)              | 28 (73.7)              | 9 (45.0)                   | 41 (60.3)                  | 29 (53.7)               | 145 (54.9)              | 0.066                      |
| No use of rescue antiemetic      | 21 (60.0)                  | 46 (93.9)              | 37 (97.4)              | 16 (80.0)                  | 64 (94.1)                  | 50 (92.6)               | 234 (88.6)              | <0.001                     |
| No clinically significant NV     | 15 (42.9)                  | 21 (42.9)              | 26 (68.4)              | 9 (45.0)                   | 40 (58.8)                  | 27 (50.0)               | 138 (52.3)              | 0.123                      |
| Acute phase, n (%)               |                            |                        |                        |                            |                            |                         |                         |                            |
| Complete response                | 25 (71.4)                  | 34 (69.4)              | 33 (86.8)              | 17 (85.0)                  | 62 (91.2)                  | 47 (87.0)               | 218 (82.6)              | 0.017                      |
| No emesis                        | 34 (97.1)                  | 34 (69.4)              | 33 (86.8)              | 19 (95.0)                  | 62 (91.2)                  | 48 (88.9)               | 230 (87.1)              | 0.002                      |
| No nausea                        | 16 (45.7)                  | 26 (53.1)              | 24 (63.2)              | 12 (60.0)                  | 38 (55.9)                  | 26 (48.1)               | 142 (53.8)              | 0.640                      |
| No clinically significant nausea | 23 (65.7)                  | 30 (61.2)              | 34 (89.5)              | 12 (60.0)                  | 42 (61.8)                  | 36 (66.7)               | 177 (67.0)              | 0.057                      |
| No use of rescue antiemetic      | 26 (74.3)                  | 47 (95.9)              | 38 (100)               | 18 (90.0)                  | 68 (100)                   | 52 (96.3)               | 249 (94.3)              | <0.001                     |
| No clinically significant NV     | 23 (65.7)                  | 27 (55.1)              | 32 (84.2)              | 12 (60.0)                  | 42 (61.8)                  | 35 (64.8)               | 171 (64.8)              | 0.118                      |
| Delayed phase, n (%)             |                            |                        |                        |                            |                            |                         |                         |                            |
| Complete response                | 21 (60.0)                  | 35 (71.4)              | 30 (78.9)              | 16 (80.0)                  | 62 (91.2)                  | 40 (74.1)               | 204 (77.3)              | 0.011                      |
| No emesis                        | 32 (91.4)                  | 35 (71.4)              | 31 (81.6)              | 19 (95.0)                  | 64 (94.1)                  | 41 (75.9)               | 222 (84.1)              | 0.004                      |
| No nausea                        | 14 (40.0)                  | 20 (40.8)              | 24 (63.2)              | 11 (55.0)                  | 43 (63.2)                  | 23 (42.6)               | 135 (51.1)              | 0.039                      |
| No clinically significant nausea | 15 (42.9)                  | 26 (53.1)              | 29 (76.3)              | 13 (65.0)                  | 47 (69.1)                  | 31 (57.4)               | 161 (61.0)              | 0.032                      |
| No use of rescue antiemetic      | 21 (60.0)                  | 46 (93.9)              | 37 (97.4)              | 16 (80.0)                  | 64 (94.1)                  | 52 (96.3)               | 236 (89.4)              | <0.001                     |
| No clinically significant NV     | 15 (42.9)                  | 25 (51.0)              | 28 (73.7)              | 12 (60.0)                  | 46 (67.6)                  | 29 (53.7)               | 155 (58.7)              | 0.048                      |

CINV chemotherapy-induced nausea and vomiting, HEC highly emetogenic chemotherapy, NV nausea or vomiting.

<sup>a</sup>P value based on Pearson's  $\chi^2$  test for general association.

**Table S13** CINV incidence in cycle 3 among patients receiving MEC, by country and overall

|                                  | <b>Australia</b><br>(n=24) | <b>China</b><br>(n=55) | <b>India</b><br>(n=38) | <b>Singapore</b><br>(n=29) | <b>So. Korea</b><br>(n=56) | <b>Taiwan</b><br>(n=67) | <b>Total</b><br>(n=269) | <b>P value<sup>a</sup></b> |
|----------------------------------|----------------------------|------------------------|------------------------|----------------------------|----------------------------|-------------------------|-------------------------|----------------------------|
| Overall phase, n (%)             |                            |                        |                        |                            |                            |                         |                         |                            |
| Complete response                | 16 (66.7)                  | 33 (60.0)              | 35 (92.1)              | 24 (82.8)                  | 51 (91.1)                  | 59 (88.1)               | 218 (81.0)              | <0.001                     |
| No emesis                        | 24 (100)                   | 33 (60.0)              | 35 (92.1)              | 24 (82.8)                  | 52 (92.9)                  | 60 (89.6)               | 228 (84.8)              | <0.001                     |
| No nausea                        | 11 (45.8)                  | 16 (29.1)              | 29 (76.3)              | 18 (62.1)                  | 31 (55.4)                  | 37 (55.2)               | 142 (52.8)              | <0.001                     |
| No clinically significant nausea | 16 (66.7)                  | 25 (45.5)              | 35 (92.1)              | 22 (75.9)                  | 41 (73.2)                  | 43 (64.2)               | 182 (67.7)              | <0.001                     |
| No use of rescue antiemetic      | 16 (66.7)                  | 45 (81.8)              | 38 (100)               | 26 (89.7)                  | 53 (94.6)                  | 64 (95.5)               | 242 (90.0)              | <0.001                     |
| No clinically significant NV     | 16 (66.7)                  | 25 (45.5)              | 34 (89.5)              | 20 (69.0)                  | 41 (73.2)                  | 41 (61.2)               | 177 (65.8)              | <0.001                     |
| Acute phase, n (%)               |                            |                        |                        |                            |                            |                         |                         |                            |
| Complete response                | 22 (91.7)                  | 44 (80.0)              | 36 (94.7)              | 24 (82.8)                  | 54 (96.4)                  | 63 (94.0)               | 243 (90.3)              | 0.024                      |
| No emesis                        | 24 (100)                   | 45 (81.8)              | 36 (94.7)              | 24 (82.8)                  | 54 (96.4)                  | 63 (94.0)               | 246 (91.4)              | 0.013                      |
| No nausea                        | 18 (75.0)                  | 30 (54.5)              | 32 (84.2)              | 21 (72.4)                  | 35 (62.5)                  | 41 (61.2)               | 177 (65.8)              | 0.048                      |
| No clinically significant nausea | 21 (87.5)                  | 38 (69.1)              | 37 (97.4)              | 24 (82.8)                  | 45 (80.4)                  | 44 (65.7)               | 209 (77.7)              | 0.002                      |
| No use of rescue antiemetic      | 22 (91.7)                  | 53 (96.4)              | 38 (100)               | 28 (96.6)                  | 55 (98.2)                  | 65 (97.0)               | 261 (97.0)              | 0.559                      |
| No clinically significant NV     | 21 (87.5)                  | 38 (69.1)              | 36 (94.7)              | 22 (75.9)                  | 45 (80.4)                  | 42 (62.7)               | 204 (75.8)              | 0.004                      |
| Delayed phase, n (%)             |                            |                        |                        |                            |                            |                         |                         |                            |
| Complete response                | 16 (66.7)                  | 35 (63.6)              | 35 (92.1)              | 24 (82.8)                  | 51 (91.1)                  | 62 (92.5)               | 223 (82.9)              | <0.001                     |
| No emesis                        | 24 (100)                   | 35 (63.6)              | 35 (92.1)              | 25 (86.2)                  | 52 (92.9)                  | 63 (94.0)               | 234 (87.0)              | <0.001                     |
| No nausea                        | 11 (45.8)                  | 18 (32.7)              | 31 (81.6)              | 19 (65.5)                  | 36 (64.3)                  | 42 (62.7)               | 157 (58.4)              | <0.001                     |
| No clinically significant nausea | 16 (66.7)                  | 28 (50.9)              | 36 (94.7)              | 23 (79.3)                  | 41 (73.2)                  | 51 (76.1)               | 195 (72.5)              | <0.001                     |
| No use of rescue antiemetic      | 16 (66.7)                  | 45 (81.8)              | 38 (100)               | 26 (89.7)                  | 53 (94.6)                  | 66 (98.5)               | 244 (90.7)              | <0.001                     |
| No clinically significant NV     | 16 (66.7)                  | 27 (49.1)              | 34 (89.5)              | 21 (72.4)                  | 41 (73.2)                  | 50 (74.6)               | 189 (70.3)              | 0.002                      |

CINV chemotherapy-induced nausea and vomiting, MEC moderately emetogenic chemotherapy, NV nausea or vomiting.

<sup>a</sup>P value based on Pearson's  $\chi^2$  test for general association.
